# Supplementary material for: Cyclin B3 is required for metaphase to anaphase transition in oocyte meiosis I
Source: PubMed Central journal article supplement — J Cell Biol. 2019 Feb 15;218(5):1553–63. doi: 10.1083/jcb.201808088 (PMC6504906; doi:10.1083/jcb.201808088), 2019-02-15
Supplement: JCB_201808088_sm.pdf [file JCB_201808088_sm.pdf]

## Supplemental material

Li et al., <https://doi.org/10.1083/jcb.201808088>

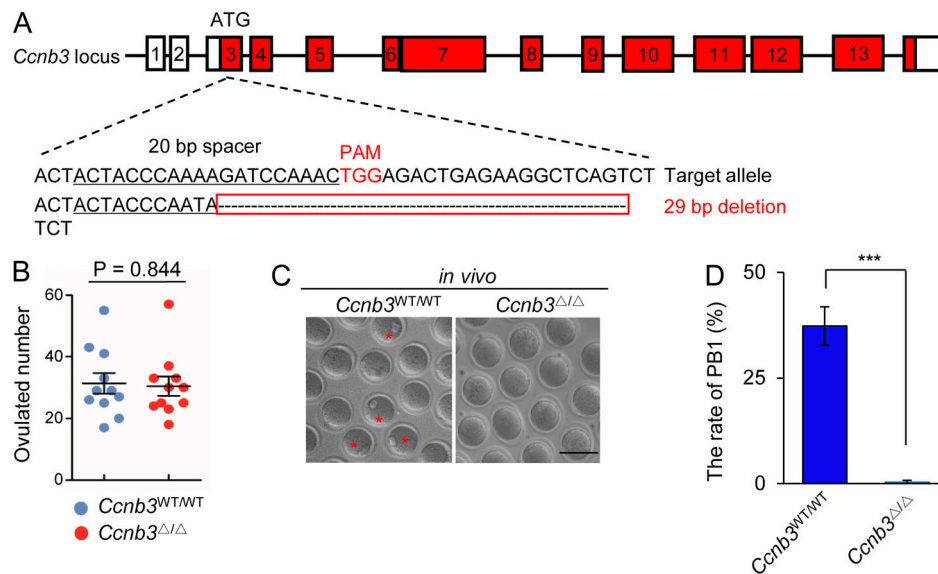

Figure S1. **Characters of *Ccnb3* mutant mice.** (A) Schematic diagram for constructing *Ccnb3* mutant mice using CRISPR/Cas9. (B) Superovulation of WT and *Ccnb3* mutant mice. The number of superovulated oocytes of *Ccnb3*<sup>Δ/Δ</sup> mice was similar to the WT; P = 0.844. (C and D) Oocytes with *Ccnb3* mutation failed to extrude PB1 by *in vivo* superovulation. The asterisk indicates the PB1. At least 300 oocytes were collected and measured in each group. Bars, 20 μm. Unpaired two-tailed Student's *t* test. Error bars represent mean ± SD; \*\*\*, P < 0.001.

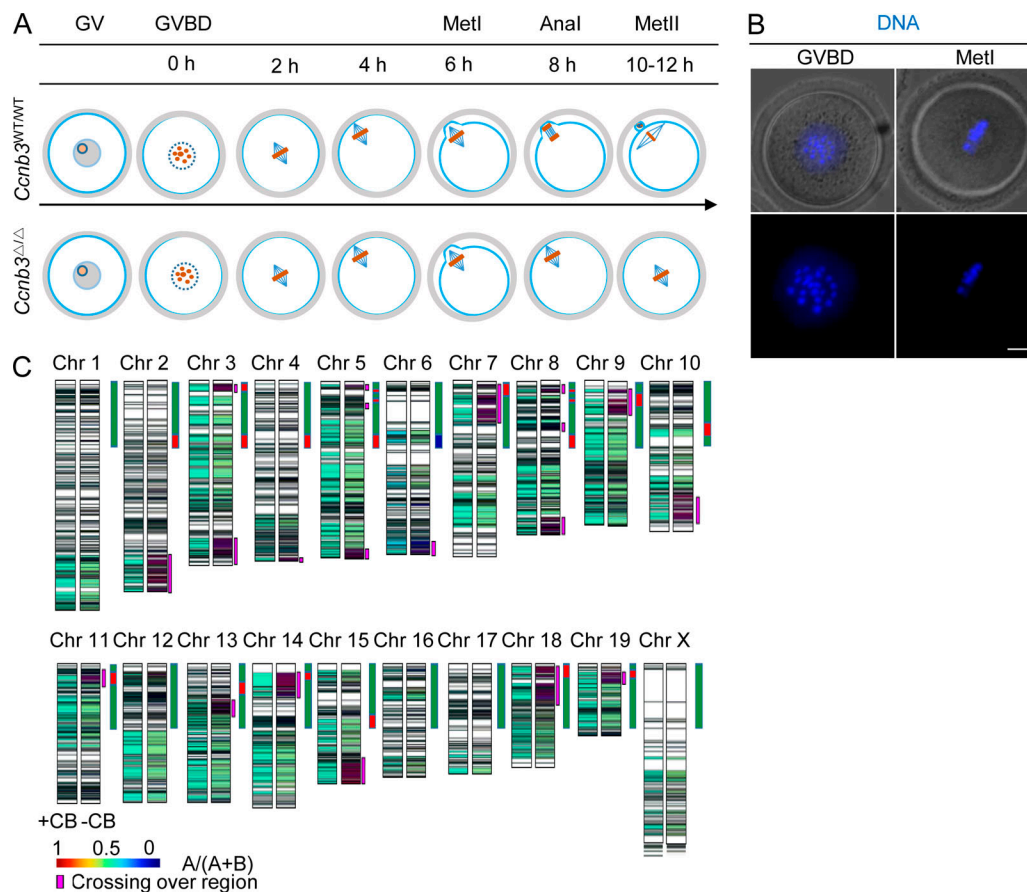

Figure S2. **Development of *Ccnb3* mutant oocytes in meiosis.** **(A)** Schematic outline of IVM process of mouse oocytes. **(B)** Oocyte developmental capacity was measured by Hoechst 33342 staining. Oocytes were incubated in M2 medium to resume meiosis; the developmental capacity was measured by Hoechst 33342 staining after 2 and 8 h of GVBD, which represent GVBD and MetI stages of oocytes, respectively. At least 100 oocytes were measured in each group. Bar, 20  $\mu$ m. **(C)** Whole genome sequencing analysis of *Ccnb3*<sup>+/Δ</sup> ESCs. The 4N ESCs (with CB treatment, referred to as +CB) and 2N ESCs (without CB treatment, referred to as -CB) are sequenced separately. Only the heterozygous sites in 4N ESCs and the corresponding sites in 2N ESCs are shown. As calculated by the base frequency ratio in one genome locus, the heterozygous sites are marked in range from green to blue, and the homozygous sites are marked in red or blue as well as the missing site marked in blank. The homozygous regions are inferred as the crossing-over region through the homozygous sites in 2N ESCs.

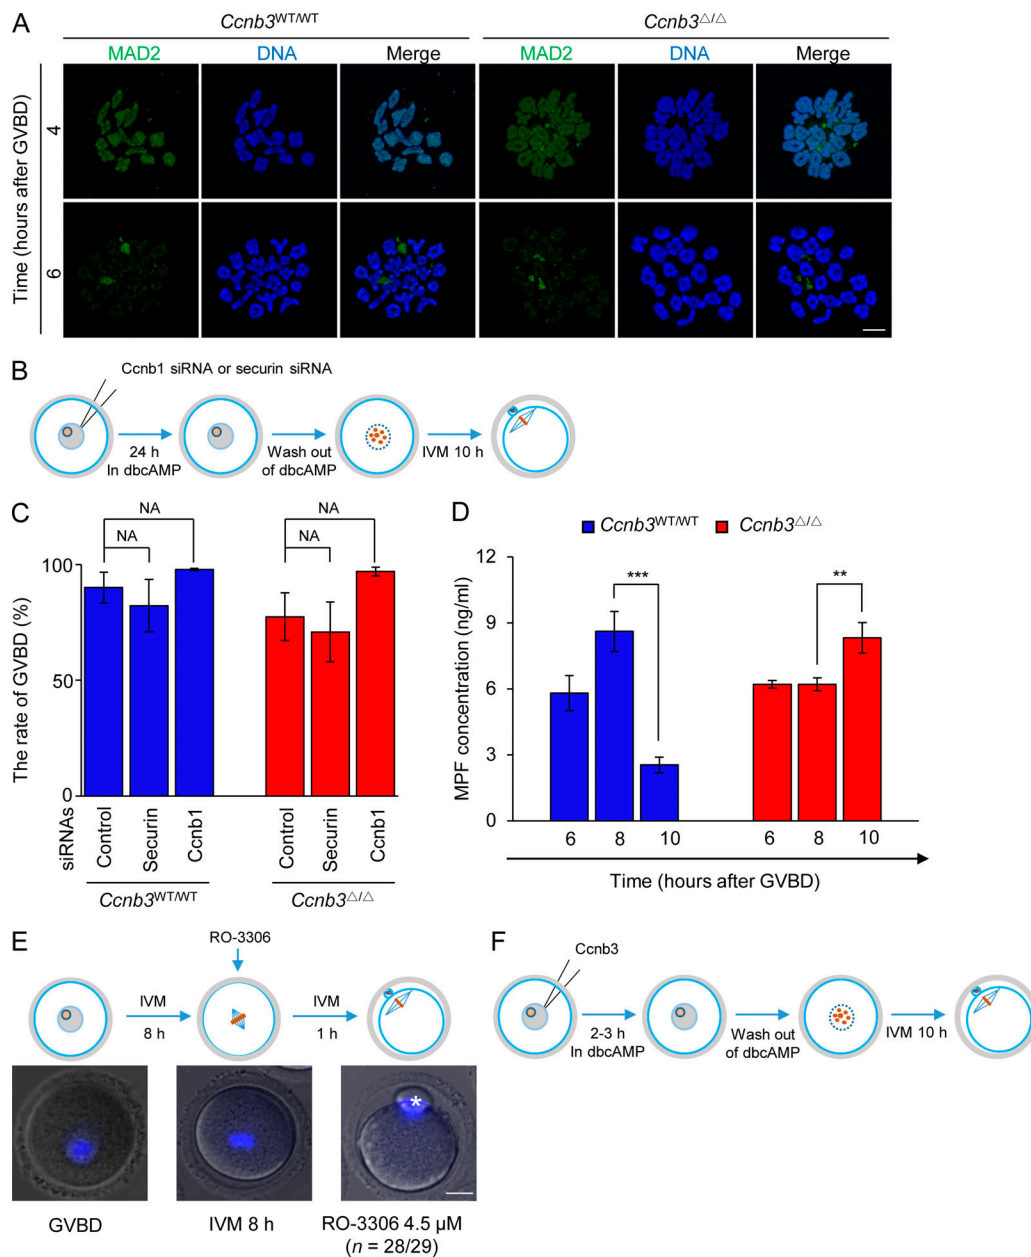

**Figure S3. Rescue of Met1 arrest caused by *Ccnb3* mutation.** (A) Immunofluorescence staining of MAD2 during IVM. At least 30 oocytes used for immunofluorescence staining. Both WT and *Ccnb3* mutant oocytes showed similar expression pattern during maturation. (B) Schematic diagram for *Ccnb1* siRNA or securin siRNA injection. GV-stage oocytes were isolated in M2 medium containing dbcAMP that inhibits GVBD and released into inhibitor-free medium after 24 h of injection. The concentration of *Ccnb1* siRNA and securin siRNA is 50  $\mu$ M. (C) The efficiency of the GVBD after *Ccnb1* siRNA and securin siRNA injection. At least 150 oocytes for each group. Error bars represent mean  $\pm$  SD; NA ( $P > 0.05$ ; Student's *t* test). (D) Quantification the MPF concentration of oocytes during IVM (6, 8, and 10 h after GVBD;  $n = 40$  oocytes per group, three repeats). Unpaired two-tailed Student's *t* test. Error bars represent mean  $\pm$  SD; \*\*,  $P < 0.01$ ; \*\*\*,  $P < 0.001$ . (E) Schematic diagram for RO-3306 treatment (top). Reduction of CDK1 activity by addition of RO-3306 (a specific inhibitor of CDK1 activity) in *Ccnb3*<sup>-/-</sup> oocyte recovered the Met1 arrest (bottom). The asterisk indicates the extruded PB. (F) Schematic diagram for *Ccnb3* mRNA injection. GV-stage oocytes were isolated in M2 medium containing dbcAMP that inhibits GVBD and released into inhibitor-free medium after 2 h of injection. The concentration of *Ccnb3* mRNA is 100 ng/ $\mu$ l. Bars: 5  $\mu$ m (A); 20  $\mu$ m (E).

**Table S1. Developmental capacity of *Ccnb3*<sup>-/-</sup> oocytes after ICSI**

| Group                                                               | No. of oocytes cultured | 2-cell (%) | 4-cell (%) | 8-cell (%) | Morula (%) | Blastocyst (%) |
|---------------------------------------------------------------------|-------------------------|------------|------------|------------|------------|----------------|
| <i>Ccnb3</i> <sup>WT/Y</sup> $\times$ <i>Ccnb3</i> <sup>WT/WT</sup> | 73                      | 73         | 70         | 66         | 65         | 59 (80.8)      |
| <i>Ccnb3</i> <sup>WT/Y</sup> $\times$ <i>Ccnb3</i> <sup>-/-</sup>   | 46                      | 41         | 39         | 35         | 33         | 31 (75.6)      |
| <i>Ccnb3</i> <sup>-/Y</sup> $\times$ <i>Ccnb3</i> <sup>-/-</sup>    | 85                      | 78         | 73         | 67         | 64         | 59 (75.6)      |

Table S2. **sgRNAs and primers designed in the study**

| <b>Assay</b> | <b>Name</b>   | <b>Sequence 5'-3'</b>   |
|--------------|---------------|-------------------------|
| sgRNA        | sgRNA-Ccnb3-1 | ACTACCCAAAAGATCCAAAC    |
|              |               | GTTTGGATCTTTGGGTAGT     |
|              | sgRNA-Ccnb3-2 | ATCCAAACTGGAGACTGAGA    |
|              |               | TCTCAGTCTCCAGTTTGGAT    |
|              | sgRNA-Ccnb3-3 | TAACAAGATCACACCTAGAG    |
|              |               | CTCTAGGTGTGATCTTGTTA    |
|              | sgRNA-Ccnb3-4 | TCATCTTCATTTTCAACTCA    |
|              |               | TGAGTTGAAAATGAAGATGA    |
|              | sgRNA-Ccnb3-5 | TAGTCAATGTGTCCAGTCAA    |
|              |               | TTGACTGGACACATTGACTA    |
|              | sgRNA-Ccnb3-6 | GCCTAAAACACTAACTACTG    |
|              |               | CAGTAGTTAGTGTTTTAGGC    |
| RT-PCR       | Ccnb1         | AAATAAGCCAAGGTCAGTATG   |
|              |               | AACAGTACCTTTTCCAGTACCT  |
|              | Ccnb3         | ACCACTACTACCCAAAAGATCCA |
|              |               | AGTTACATCTTCAAACTGATC   |

Table S3. **Reagent or resource used in the study**

| <b>Reagent or Resource</b>                                                         | <b>Source</b>                                                                                 | <b>Identifier</b>                                                                             |
|------------------------------------------------------------------------------------|-----------------------------------------------------------------------------------------------|-----------------------------------------------------------------------------------------------|
| <b>Antibodies</b>                                                                  |                                                                                               |                                                                                               |
| Mouse anti-Cyclin B3                                                               | Presented from Scott laboratory                                                               | N/A                                                                                           |
| Rabbit anti-CDK1                                                                   | Abcam                                                                                         | No. ab32094                                                                                   |
| Rabbit anti-Cyclin B1                                                              | Abcam                                                                                         | No. ab181593                                                                                  |
| Mouse anti-alpha Tubulin                                                           | Sigma                                                                                         | No. T6199                                                                                     |
| Goat anti-rabbit IRDye 800CW                                                       | Licor                                                                                         | No. 926-3221                                                                                  |
| Goat anti-mouse IRDye 800CW                                                        | Licor                                                                                         | No.926-32210                                                                                  |
| Anti-rabbit IgG HRP                                                                | Rockland                                                                                      | No. 18-8816-33                                                                                |
| Rabbit anti-MAD2                                                                   | Abcam                                                                                         | No. ab180579                                                                                  |
| Rabbit anti-BUB3                                                                   | Abcam                                                                                         | No. ab133699                                                                                  |
| Mouse anti-SECURIN                                                                 | Abcam                                                                                         | No. ab3305                                                                                    |
| Rabbit anti-REC8                                                                   | Abcam                                                                                         | No. ab192241                                                                                  |
| <b>siRNAs</b>                                                                      |                                                                                               |                                                                                               |
| Ccnb1 siRNA Silencer Select                                                        | Thermo Fisher                                                                                 | s114071; No. 4390771                                                                          |
| Ccnb1 siRNA Silencer Select                                                        | Thermo Fisher                                                                                 | s114072; No. 4390771                                                                          |
| Ccnb1 siRNA Silencer Select                                                        | Thermo Fisher                                                                                 | s114073; No. 4390771                                                                          |
| Ccnb1 siRNA                                                                        | Thermo Fisher                                                                                 | 153133; No. AM16708                                                                           |
| Securin siRNA Silencer Select                                                      | Thermo Fisher                                                                                 | 132000                                                                                        |
| Securin siRNA Silencer Select                                                      | Thermo Fisher                                                                                 | 1320003                                                                                       |
| Securin siRNA Silencer Select                                                      | Thermo Fisher                                                                                 | 1320003                                                                                       |
| Ccnb3-mus-1532 (F: 5'-GCAAGCCAUUGUUCUUAATT-3';<br>R: 5'-UUAAAGAACAUGGCUUGCTT-3')   | Sangon Biotech                                                                                | N/A                                                                                           |
| Ccnb3-mus-2229 (F: 5'-CCAUAAGUCUUUGGACUUUTT-3';<br>R: 5'-AAAGUCCAAAGACUUAUGGTT-3') | Sangon Biotech                                                                                | N/A                                                                                           |
| Ccnb3-mus-3971 (F: 5'-GCAUGAAGACACUAACCUUTT-3';<br>R: 5'-AAGGUUAGUGUCUUAUGCTT-3')  | Sangon Biotech                                                                                | N/A                                                                                           |
| Reagent or Resource                                                                | Source                                                                                        | Identifier                                                                                    |
| <b>siRNAs (Continued)</b>                                                          |                                                                                               |                                                                                               |
| NC (F: 5'-UUCUCCGAACGUGUC ACGUTT-3';<br>R: 5'-ACGUGACACGUUCGGAGAATT-3')            | Sangon Biotech                                                                                | N/A                                                                                           |
| <b>Software and Algorithms</b>                                                     |                                                                                               |                                                                                               |
| SnapGene                                                                           |                                                                                               |                                                                                               |
| Quantity One                                                                       |                                                                                               |                                                                                               |
| ImageJ                                                                             |                                                                                               |                                                                                               |
| DNASTAR                                                                            |                                                                                               |                                                                                               |
| PrimerBank                                                                         | <a href="https://pga.mgh.harvard.edu/primerbank/">https://pga.mgh.harvard.edu/primerbank/</a> | <a href="https://pga.mgh.harvard.edu/primerbank/">https://pga.mgh.harvard.edu/primerbank/</a> |
| <b>Plasmids</b>                                                                    |                                                                                               |                                                                                               |
| Securin-EGFP                                                                       | Youbio Biotech                                                                                | No. G148185                                                                                   |
| Ccnb1-EGFP                                                                         | Youbio Biotech                                                                                | No. G144604                                                                                   |
| Ccnb3-EGFP                                                                         | Youbio Biotech                                                                                | No. 35391                                                                                     |
